# Supplementary material for: Peripheral sensory neuron injury contributes to neuropathic pain in experimental autoimmune encephalomyelitis
Source: PubMed Central journal article supplement (PMC5299449; doi:10.1038/srep42304), 2017-02-09
Supplement: srep42304-s1.pdf [file srep42304-s1.pdf]

1           **Peripheral sensory neuron injury contributes to neuropathic pain in**

2                           **experimental autoimmune encephalomyelitis**

3

4    I-Ching Wang, Chen-Yen Chung, Fang Liao, Chih-Cheng Chen, Cheng-Han Lee

5

6

7

8

9

10

11

12

13

14

15

16

## 1 **Supplementary methods**

### 2 **Western blot**

3 After mice sacrificed, total DRG were freshly collected in ice-cold homogenized  
4 buffer, which contains 50mM Tris-HCl (pH7.4), 120mM sodium chloride, 1mM  
5 EDTA, 5mM potassium chloride and 4mM magnesium chloride. After homogenized,  
6 the homogenates were centrifuged at 200 xg, 10min, 4°C to remove cell debris. The  
7 supernatant was collected and centrifuged at 48000 xg, 20min, 4°C. After  
8 centrifugation, the supernatant containing the cytosolic proteins was saved and the  
9 pellet representing the membrane fraction was resuspended in 300 µl lysis buffer  
10 containing 1% digitonin, 50mM Tris-HCl, 300mM NaCl, and 100mM PMSF for 1  
11 hour at 4°C. 10µg of each sample was loaded in 10% acrylamide gel for  
12 electrophoresis followed by transferring to PVDF membrane (PerkinElmer, Taipei,  
13 Taiwan). Membrane was incubated in 5% skimmed milk in PBS with 0.1% tween-20  
14 (PBS-T) for 1 hour, room temperature. All primary antibodies were incubated at 4°C  
15 overnight. ASIC1a was stained by Goat anti-ASIC1 (1:200, Santa Cruz  
16 Biotechnologies Inc., Texas, USA) antibody, the membrane and cytosol markers used  
17 were Mouse anti-  $\alpha$ 1-sodium potassium ATPase (1:1000, Abcam, Cambridge, UK)

1 and Mouse anti- $\alpha$ -tubulin (1:5000, Sigma-Aldrich, St Louis, MO, USA) respectively.  
2 Anti-goat and anti-mouse secondary antibodies conjugated with HRP were incubated  
3 for 1 hour at room temperature. Chemifluorescence signal was captured and  
4 quantified by UVP biospectrum auto imaging system (UVP, Upland, CA). ASIC1a  
5 level of membrane fraction was normalized by  $\alpha$ -tubulin.

6

#### 7 **Hargreaves test**

8 Thermal pain was conducted with Hargreaves machine (IITC Inc. Life Science, CA).  
9 The radiant heat stimulus intensity was set as 20% and the inactive intensity was set  
10 as 5%. Mice were allowed to habituate for at least 30 minutes before experiment.  
11 Every mouse was tested 3 times per each hind paw. Thermal response assessment was  
12 performed within 3 days prior to EAE induction and selected time points. EAE mice  
13 with score higher than 3 were excluded.

14

#### 15 **Quantitative PCR**

16 Total RNA was isolated from lumbar part dorsal root ganglia with TRIzol reagents  
17 and transcribed into cDNA with non-specific primer Oligo(dT). Next, quantitative

1 PCR was performed on ABI prism 7500 Sequence Detection system (Thermo Fisher  
2 Scientific, Waltham, MA). Gene expression levels were evaluated and quantified by  
3 using Taqman probes of GAPDH (Mm99999915\_g1), IL17a (Mm00439618\_m1) and  
4 IFN $\gamma$  (Mm01168134\_m1). Each amplification reaction was performed in duplicate  
5 and carried out in a 20- $\mu$ l reaction, containing 100ng cDNA, 1 $\mu$ l of 20X Taqman  
6 probe, and 10 $\mu$ l of 2X Taqman Universal PCR Master Mix. The reactions were  
7 completed as follows: 2 min at 50°C (1 cycle); 10 min at 95°C (1 cycle); 15 s at 95°C,  
8 and 60 s at 60°C (65 cycles). Gene expression was detected using the  $\Delta\Delta C_T$  method  
9 relative to GAPDH and normalized to naïve treatment.

10

11

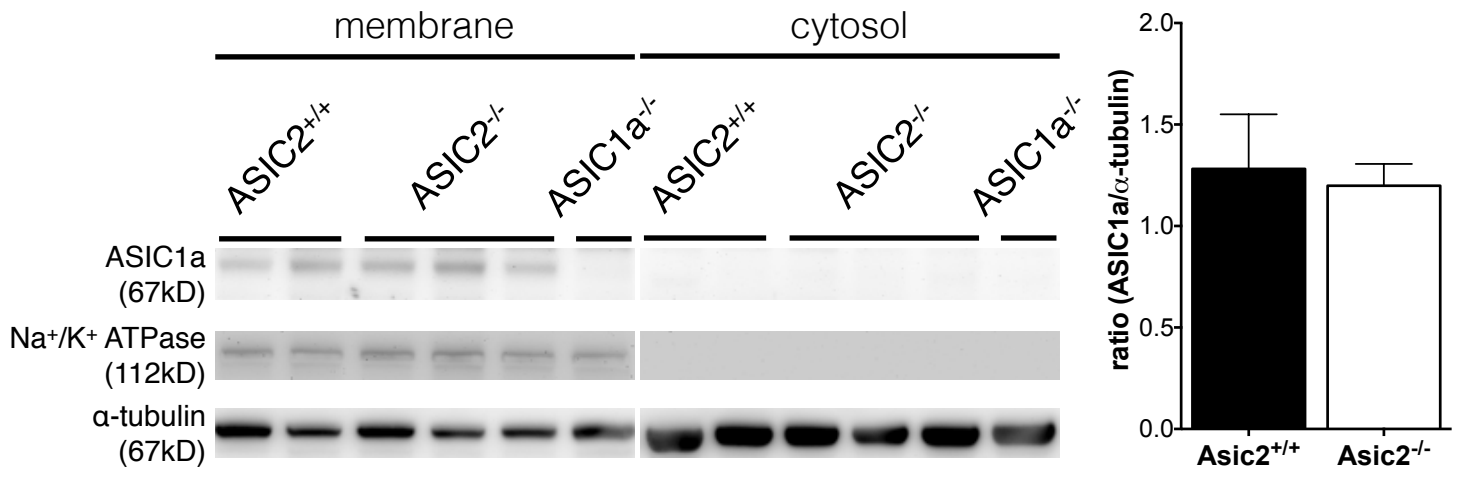

**Supplementary Figure S1.** Expression of ASIC1a in DRG of ASIC2 knockout mice. Total DRGs were collected to detect ASIC1a protein level. Na<sup>+</sup>/K<sup>+</sup> ATPase is a membrane protein for sample normalization to total membrane fraction and α-tubulin was a cytosolic marker. DRG of *Asic1a*<sup>-/-</sup> was a negative control for ASIC1a signal. *Asic2*<sup>+/+</sup> N=2, *Asic2*<sup>-/-</sup> N=3 for quantitative analysis. t test P=0.7544.

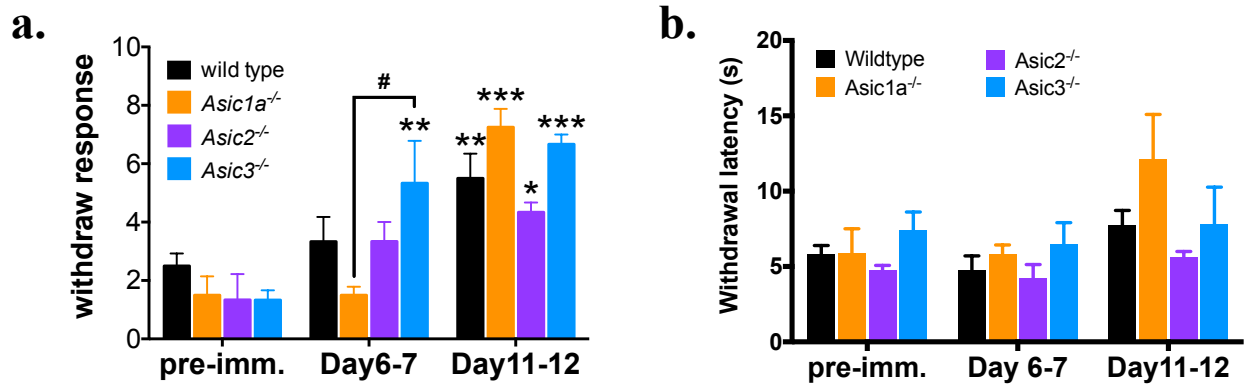

**Supplementary Figure S2.** Mechanical and thermal responses of ASIC-subtype knockout mice in pre-onset and early onset phases. **a.** Mechanical responses to von Frey test. Two-way ANOVA, Time :  $F_{(2, 24)} = 34.00$ ,  $P < 0.0001$ , treatment :  $F_{(3, 12)} = 1.266$ ,  $P = 0.3301$  interaction :  $F_{(6, 24)} = 3.062$ ,  $P = 0.0227$ , \*  $P < 0.05$ , \*\*  $P < 0.01$ , \*\*\*  $P < 0.001$  compared with respective pre-immune group. #  $P < 0.05$ . **b.** Thermal sensitivity assessment by Hargreaves test. Two-way ANOVA, interaction:  $F_{(6, 24)} = 1.060$ ,  $P = 0.4133$ ; Time:  $F_{(2, 24)} = 4.969$ ,  $P = 0.0156$ ; Genotype:  $F_{(3, 12)} = 2.320$ ,  $P = 0.1270$ . Wild-types  $N = 6$ ; *Asic1a*<sup>-/-</sup>  $N = 4$ , *Asic2*<sup>-/-</sup>  $N = 3$ , *Asic3*<sup>-/-</sup>  $N = 3$ .

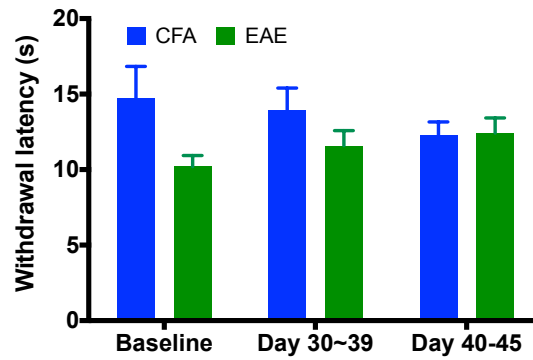

**Supplementary Figure S3.** EAE mice showed no difference in thermal hyperalgesia compared with CFA mice in the recovery phase. Two-way ANOVA, interaction:  $F_{(2, 18)} = 1.675$ ,  $P = 0.2152$ ; Time:  $F_{(2, 18)} = 0.052$ ,  $P = 0.9495$ ; Treatment:  $F_{(1, 9)} = 5.023$ ,  $P = 0.0517$ . CFA: N=3, EAE: N=8.

**a.**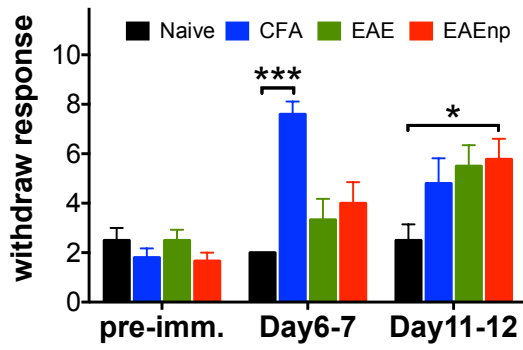**b.**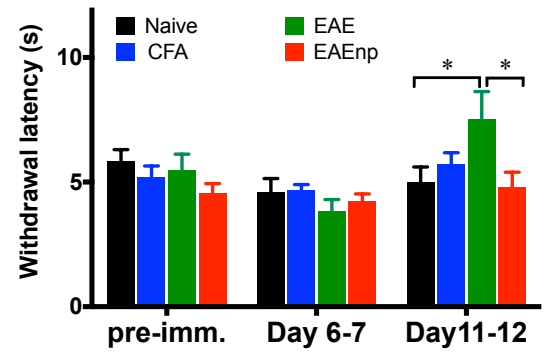

**Supplementary Figure S4.** Mechanical and thermal response of Naive, CFA, EAE and EAEnp mice in pre-onset and early onset phases. **a.** Mechanical response by von Frey test. Two-way ANOVA, time:  $F_{(2, 40)}=14.63$ ,  $P<0.0001$ ; treatment:  $F_{(3, 20)}=3.068$ ,  $P=0.0514$ ; interaction:  $F_{(6, 40)}=4.764$ ,  $P=0.001$  \*:  $P<0.05$ , \*\*\*:  $P<0.001$  compared with naive control in the same time point. **b.** Thermal sensitivity examination by Hargreaves test. Two-way ANOVA, interaction:  $F_{(6, 40)} = 2.136$ ,  $P = 0.0702$ ; time:  $F_{(6,40)} = 6.435$ ,  $P = 0.0038$ ; treatment:  $F_{(3, 20)} = 2.130$ ,  $P = 0.1284$ . Naive: N=4, CFA: N=5, EAE: N=6, EAEnp: N=9.



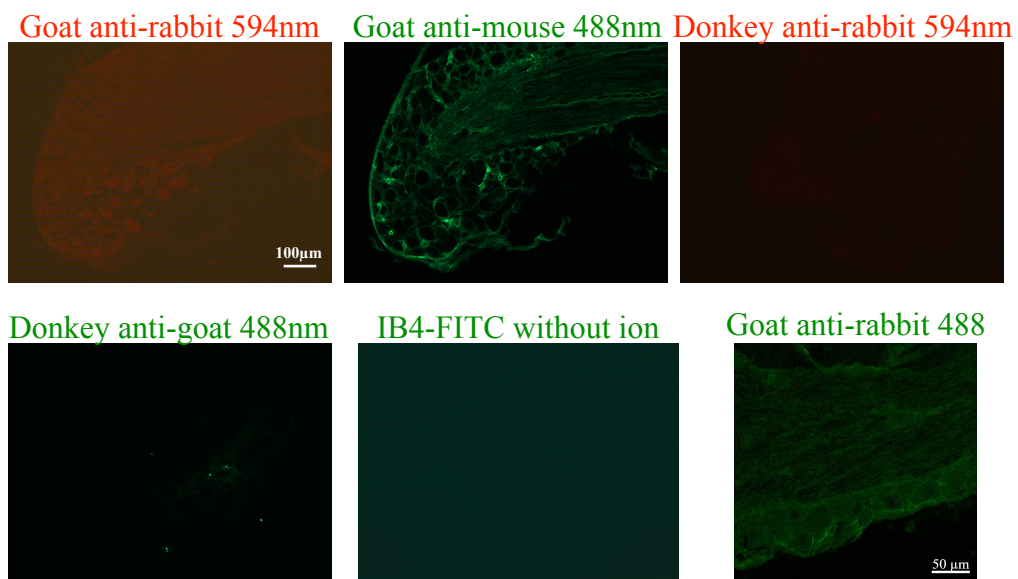

**Supplementary Figure S5.** Secondary antibody controls for immunohistochemistry staining on wild-type DRG sections.

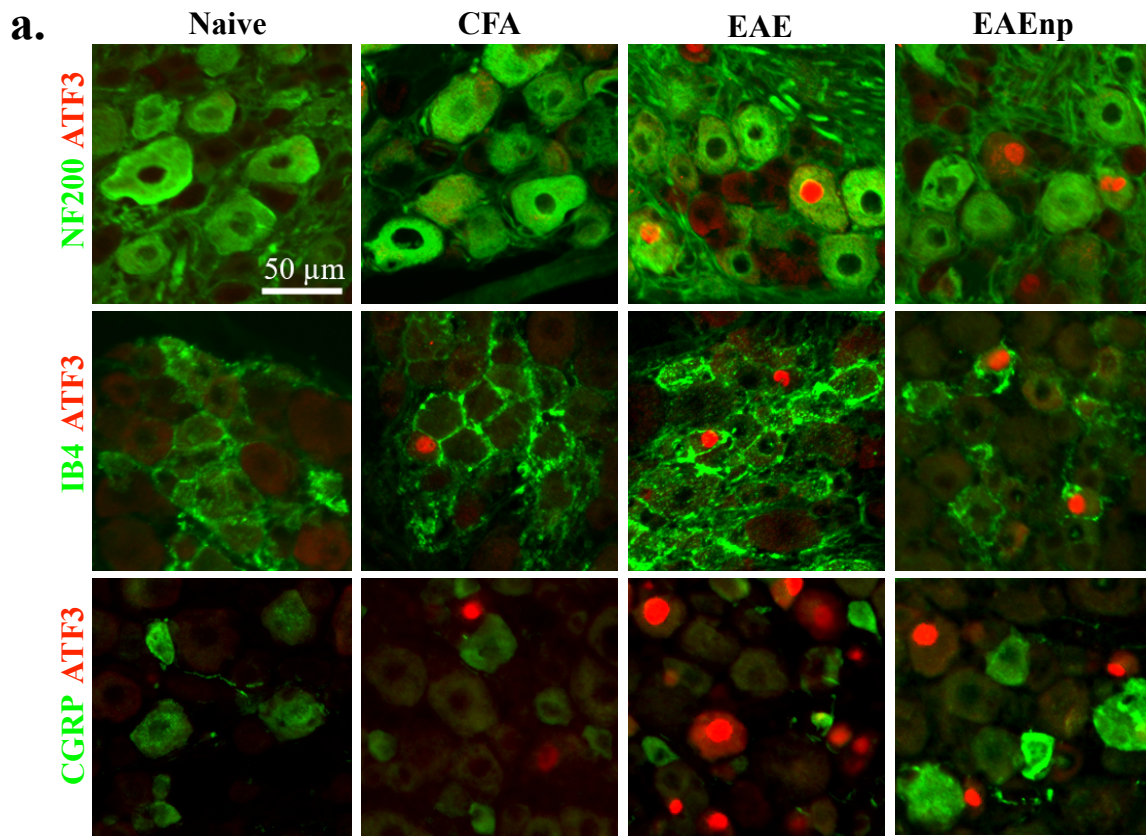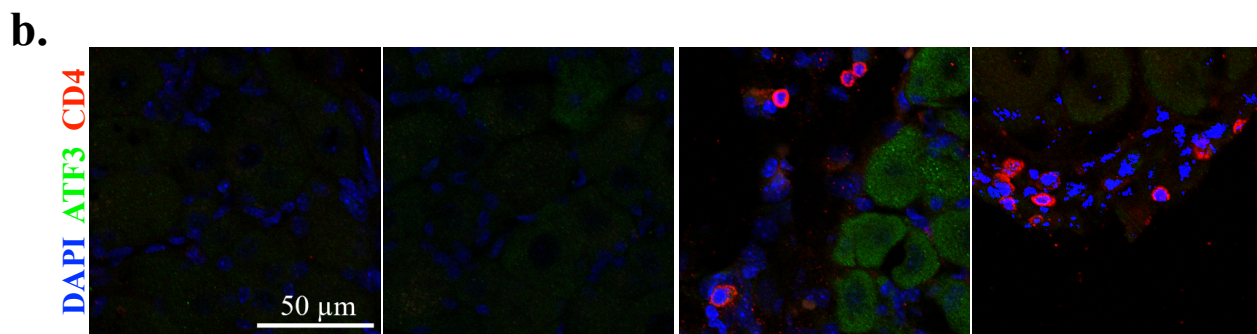

Supplementary Figure S6. Magnified images of Fig 6.

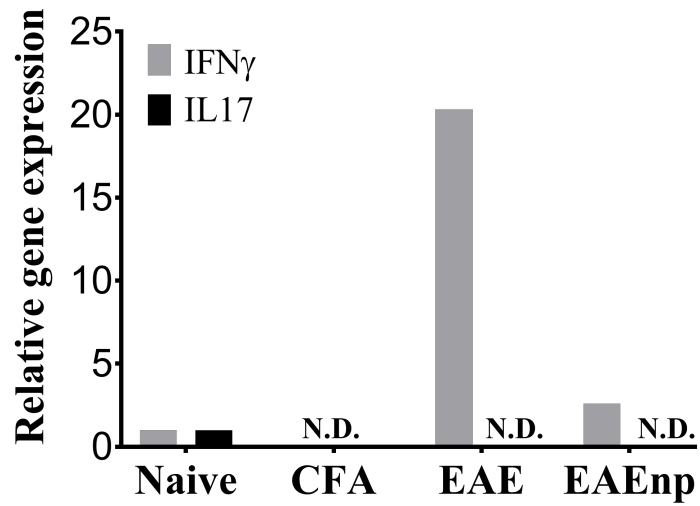

**Supplementary Figure S7.** Quantitative PCR results of interferon  $\gamma$  and interleukin 17 in lumbar DRG of naive, CFA, EAE and EAEnp mice. mRNA level of IFN $\gamma$  and IL-17 is relative to GAPDH and normalized to naive. N=1 in each group, N.D. not detected
